# Supplementary material
Source: PubMed Central journal article supplement (PMC3466911)
Supplement: Supp_Table.pdf [file Supp_Table.pdf]

## Supplementary Data

SUPPLEMENTARY TABLE S1. ANTHROPOMETRIC INDICATORS OF BODY SIZE AND FAT DISTRIBUTION BY SELF-REPORTED BODY SHAPE AMONG OBESE WOMEN

|                                       | <i>Pear</i>         | <i>Hourglass</i>    | <i>Rectangle</i>    | <i>Apple</i>        | <i>p value</i> <sup>a</sup> |
|---------------------------------------|---------------------|---------------------|---------------------|---------------------|-----------------------------|
| Total                                 | 10                  | 12                  | 10                  | 5                   |                             |
| Body size                             |                     |                     |                     |                     |                             |
| Height (cm)                           | 163.5 (158.5-168.4) | 166.0 (161.8-170.3) | 167.0 (161.3-172.7) | 162.4 (161.0-163.8) | 0.50                        |
| Weight (kg)                           | 96.1 (81.2-115.6)   | 98.0 (92.5-106.3)   | 104.1 (94.3-115.6)  | 82.6 (76.9-89.0)    | 0.09                        |
| BMI (kg/m <sup>2</sup> )              | 35.7 (33.4-38.2)    | 35.7 (33.3-38.5)    | 37.0 (34.5-40.0)    | 32.3 (29.4-33.3)    | 0.12                        |
| Body shape                            |                     |                     |                     |                     |                             |
| Chest circumference (cm) <sup>b</sup> | 93.5 (87.0-102.0)   | 90.9 (85.4-96.2)    | 99.0 (93.5-105.3)   | 89.3 (87.7-90.9)    | 0.11                        |
| Hip circumference (cm)                | 123.5 (113.6-135.1) | 125.0 (120.5-131.6) | 125.0 (116.3-133.3) | 116.3 (111.1-122.0) | 0.51                        |
| Waist circumference (cm)              | 103.1 (96.2-112.4)  | 104.2 (98.0-112.4)  | 100 (86.2-119.1)    | 94.3 (87.0-102.0)   | 0.55                        |
| Chest-to-waist ratio <sup>b</sup>     | 0.91 (0.84-0.97)    | 0.97 (0.87-1.09)    | 0.87 (0.83-0.91)    | 0.95 (0.88-1.02)    | 0.12                        |
| Chest-to-hip ratio <sup>b</sup>       | 0.76 (0.72-0.81)    | 0.73 (0.69-0.77)    | 0.80 (0.75-0.84)    | 0.77 (0.74-0.79)    | 0.11                        |
| Waist-to-hip ratio                    | 0.84 (0.81-0.87)    | 0.84 (0.80-0.87)    | 0.83 (0.73-0.91)    | 0.81 (0.74-0.88)    | 0.90                        |
| Waist-to-height ratio                 | 0.64 (0.59-0.69)    | 0.64 (0.59-0.68)    | 0.62 (0.55-0.69)    | 0.58 (0.54-0.54)    | 0.49                        |
| Central adiposity indicators          |                     |                     |                     |                     |                             |
| Waist circumference, <i>n</i> (%)     |                     |                     |                     |                     |                             |
| < 88 cm                               | 1 (10.0)            | 1 (8.3)             | 1 (10.0)            | 1 (20.0)            | 0.90                        |
| ≥ 88 cm                               | 9 (90.0)            | 11 (91.7)           | 9 (90.0)            | 4 (80.0)            |                             |
| Waist-to-hip ratio, <i>n</i> (%)      |                     |                     |                     |                     |                             |
| < 0.80                                | 3 (30.0)            | 2 (16.7)            | 3 (30.0)            | 2 (40.0)            | 0.72                        |
| ≥ 0.80                                | 7 (70.0)            | 10 (83.3)           | 7 (70.0)            | 3 (60.0)            |                             |
| Waist-to-height ratio, <i>n</i> (%)   |                     |                     |                     |                     |                             |
| < 0.50                                | 0 (0)               | 1 (8.3)             | 1 (10.0)            | 0 (0)               | 1.0                         |
| ≥ 0.50                                | 10 (100)            | 11 (91.7)           | 9 (90.0)            | 5 (100)             |                             |

Data presented as means (95% confidence interval [CI]) on original scale unless specified otherwise.

<sup>a</sup>*p* value based on ANOVA for continuous variables or Fisher's exact test for categorical variables.

<sup>b</sup>*n* = 10, 10, 10, and 5 for pear, hourglass, rectangle, and apple shapes, respectively.

BMI, body mass index.
